# Supplementary material
Source: MDPI journal article supplement (https://www.mdpi.com/2227-7102/11/3/90)
Supplement: s1 [file s1]

**Table S1:** List of the 60 author-created multiple-choice questions used for pretest and posttest assessment. *Note:* answers are starred (\*) and bolded.

1. Georgians generally consider themselves more European than Asian.
  - a. **\*True**
  - b. False
  
2. Does Georgia border Eastern Europe?
  - a. **\*Yes**
  - b. No
  
3. Which country is Georgia's northern neighbor?
  - a. **\*Russia**
  - b. Turkey
  - c. Armenia
  - d. Azerbaijan
  
4. If Georgia were a US state, it would be smaller or bigger than Rhode Island?
  - a. Smaller
  - b. **\*Bigger**
  
5. Georgia is slightly smaller than Ireland.
  - a. **\*True**
  - b. False
  
6. When did Georgia gain independence from the Soviet Union?
  - a. **\*1991**
  - b. 1990
  - c. 1985
  - d. 1995
  
7. Russia supports separatist movements in Georgia. Which two areas do they focus on? Select two answers.
  - a. **\*Abkhazia**
  - b. **\*South Ossetia**
  - c. Tbilisi
  - d. The Black Sea

- 
8. Which of the following is NOT a major natural resource in Georgia?
- a. Hydropower
  - b. Timber
  - c. Iron
  - d. Ore
  - e. **\*Lithium**
9. Cave diving is a popular tourist attraction in Georgia
- a. **\*True**
  - b. False
10. How many people live in Georgia?
- a. **\*4 million**
  - b. 3 million
  - c. 5 million
  - d. 10 million
11. Georgia is a fairly homogenous country, with most people being ethnically Georgian.
- a. **\*True**
  - b. False
12. The Georgian language is part of what language group?
- a. **\*Kartvelian**
  - b. Velikartian
  - c. Russian
  - d. Aramaic
13. Since 2003, what is the preferred language to learn in public schools?
- a. **\*English**
  - b. German
  - c. Russian
14. Religion plays an important part of life in Georgia.
- a. **\*True**
  - b. False
15. More than 80% of the country is what religious affiliation?

- 
- a. **\*Christian-Orthodox**
  - b. Roman Catholic
  - c. Protestant
  - d. Muslim
16. The Georgian Orthodox Church tends to play a large role in Georgian culture and politics.
- a. **\*True**
  - b. False
17. A previous president, Mikhael Saakashvili, was associated with Russia more than the West.
- a. True
  - b. **\*False**
18. The August 2008 conflict with Russia affected GDP growth in the following years - by about how much?
- a. - 2%
  - b. **\*- 4%**
  - c. - 6%
19. As of 2017, what is Georgia's overall per capita GDP?
- a. **\*About \$10,000**
  - b. About \$15,000
  - c. About \$7,500
20. Exports of goods and services comprise a significant portion of the Georgian economy
- a. **\*True**
  - b. False
21. Wine, Citrus, Hazelnuts and Tea are significant agricultural crops.
- a. **True**
  - b. False
22. What is "supra"?
- a. **The Georgian word for 'feast'**
  - b. The Russian word for 'wine'
  - c. The German word for 'grapes'
23. How are khatchapuri served? Select all that apply

- a. **\*Closed**
- b. Cold
- c. **\*Hot**
- d. **\*Open**

24. Khatchapuri is what?

- a. **\*Bread filled with cheese**
- b. Cheese filled with bread
- c. A wine taken with bread

25. A Georgian supra includes: (Select All that apply)

- a. **\*Khatchapuri**
- b. **\*Khinkali**
- c. **\*Satsivi**
- d. Borst (need new distractor)

26. In Georgia, the supra is designed around the consumption of wine as well as the toasts that are made, and the sequence of events is important.

- a. **\*True**
- b. False

27. Georgians will consider it rude if you drink before a toast has been made.

- a. **\*Yes.**
- b. No.

28. What is the capital of Georgia?

- a. **\*Tbilisi**
- b. Batumi
- c. Kutaisi

29. Georgia's natural gas imports have moved from:

- a. **\*Russia → Azerbaijan**
- b. Azerbaijan → Russia
- c. Armenia → Germany

30. Which letter on this map indicates Georgia?

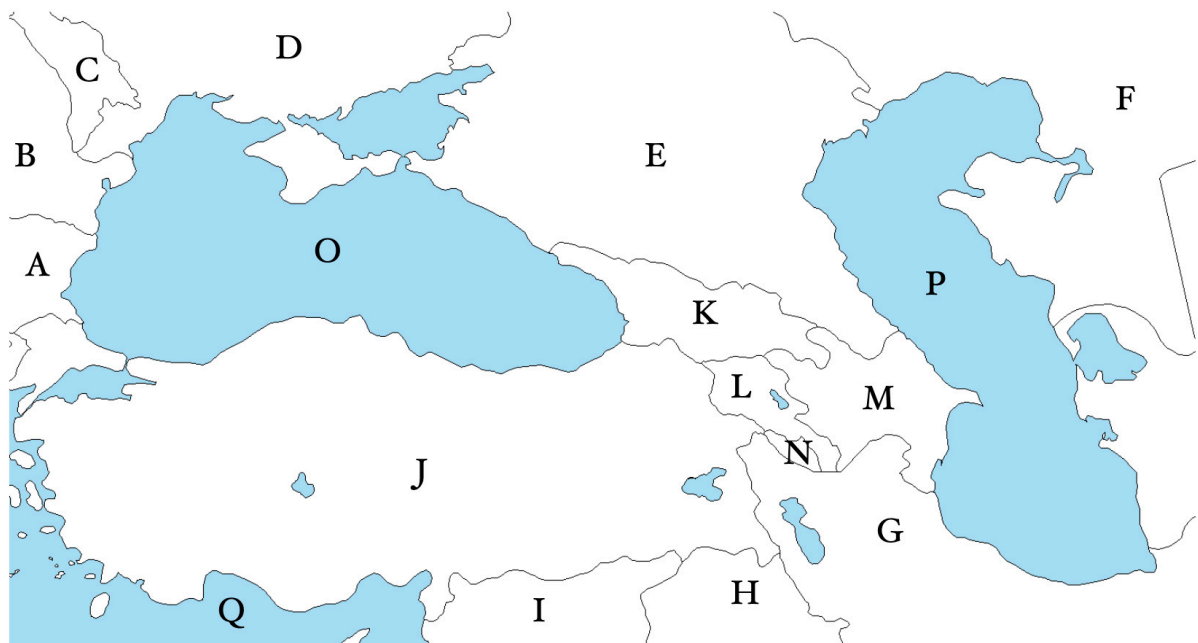

Image: author owned.

- A
- B
- C
- D
- E
- F
- G
- H
- I
- J
- \*K
- L
- M
- N
- O
- P
- Q

31. Georgia has a significant Internally Displaced Population.

- a. \*True
- b. False

- 
32. Georgia is often used by criminal organizations and others as a transit point for opiates in particular from Central Asia to Europe
- \*True**
  - False
33. What forms of government does Georgia have?
- \*Parliamentary republic**
- Monarchy
- Military dictatorship
- Theocracy
- Oligarchy
- Federal republic
34. How many crosses are on the Georgian flag?
- 1
  - 2
  - 3
  - 4
  - \*5**
  - 6
35. If you mixed the colors that comprise the Georgian flag together, what new color would you be left with?
- Red
- \*Pink**
- White
- Green
- Blue
- Gray
- Orange
- Yellow
36. Which sea does Georgia border?
- Adriatic sea
- Aegean sea
- \*Black sea**
- Caspian sea
- Baltic sea
- North sea
37. How many miles of coastline does Georgia have?
- 90+ miles

- b. 109+ miles
- c. **\*190+ miles**
- d. 910+ miles

38. In which mountain range is Georgia nested?

- Apennine
- Balkan
- Cairngorms
- Carpathian
- \*Caucasus**
- Crimean
- Eastern Alps
- Pyrenees
- Ural
- Western Alps

39. Is Georgia bigger than Texas?

- Yes
- \*No**

40. Historically, was Georgia part of the British Empire?

- Yes
- \*No**

41. Name the two deepest caves in Georgia.

- Bgheri
- Didghele
- \*Krubera**
- Navenakhevi
- Uplistsikhe
- \*Veryovkina**

42. If you subtracted the depth of Georgia's second deepest cave from its deepest, what would the total resulting depth be?

- 14215
- \*-14465**
- 14537
- 14735

43. What are Chan and Svan with respect to Georgia?

- Baked food eaten by some Georgians
- Caves explored by some Georgians

Colorful textiles worn by some Georgians

**\*Languages spoken by some Georgians**

Orthodox saints revered by some Georgians

Traditional toasts made by some Georgians

44. What color is the Georgian ₾50 bill?

Blue

Brown

**\*Green**

Purple

45. What are qveri used for?

Catching fish

Climbing mountains

Collecting mail

**\*Fermenting grapes**

Guiding ships

Herding sheep

46. Are qveri larger, smaller, or about the same size as an American Football?

About same

**\*Larger**

Smaller

47. Translate the Georgian word 'sivi' into English

Baby

**\*Cold**

Dust

Lead

Pets

Stream

48. What's the reason for pomegranate seeds being included in satsivi?

**\*As a garnish**

Provide sweetness

Source of vitamin B5

Substitute for gluten

49. Traditionally, what is the third toast dedicated to in a Georgian supra?

Deceased ones

Georgia

God



Family

Freedom

Life

Love

Parents

The late guest

**\*The reason for the gathering**

50. How long is the approximate travel time between Tsibili and Batumi by rail?

2 hours

3 hours

4 hours

**\*5 hours**

6 hours

51. About how much of Georgian land is devoted to agriculture?

a. 1/10

b.  $\frac{1}{5}$

**c.  $\frac{1}{3}$**

d.  $\frac{1}{2}$

52. About what percentage of Georgian land is forest?

a. 10%

b. 20%

**c. \*40%**

d. 60%

53. Economic growth was fastest during which years?

a. 1992-1993

b. 1999-2000

**c. \*2006-2007**

d. 2018-2019

54. Who was president during Georgia's largest economic expansion?

a. Gamsakhurdia

b. Margvelashvili

**c. \*Saakashvili**

d. Zourabichvili

55. How many air carriers are registered in Georgia?

- a. 1
- b. 3
- c.\*5**
- d. 7

56. About how many air passengers per year are there in Georgia?

- a. 50,000
- b. 100,000
- c.\*250,000**
- d. 500,000

57. Transportation infrastructure has focused more on which direction?

- a. \*East-West**
- b. North-South
- c.Black sea-Russia
- d. Caspian sea-Turkey

58. In regards to energy Georgia is a net

- a. \*Importer of oil and natural gas**
- b. Importer of oil and exporter of natural gas
- c.Exporter of oil and natural gas
- d. Exporter of oil and importer of natural gas

59. A major gas pipeline running through Georgia enters and exits from which border countries?

- a. Armenia and Russia
- b. Armenia and Turkey
- c.\*Azerbaijan and Turkey**
- d. Russia and Turkey

60. Which language has not been commonly learned in public Georgian schools?

- a) English
- b) German
- c) \*Turkish**
- d) Russian
